# Supplementary material for: Chocolate consumption and all-cause and cause-specific mortality in a US population: a post hoc analysis of the PLCO cancer screening trial
Source: publisher site journal article supplement (doi:10.18632/aging.203302), 2021-07-29
Supplement: Supplementary file [file aging-v13i14-203302-supplementary-material-SD2.pdf]

## SUPPLEMENTARY TABLES

**Supplementary Table 1. Sensitivity analyses on the association of chocolate consumption with mortality from all causes, cardiovascular disease, and cancer<sup>a</sup>.**

| Categories                                                                             | Chocolate consumption (servings/week) |                  |                  |                  |                  | <i>P</i> <sub>trend</sub> |
|----------------------------------------------------------------------------------------|---------------------------------------|------------------|------------------|------------------|------------------|---------------------------|
|                                                                                        | 0                                     | >0–0.5           | >0.5–1           | >1–2             | >2               |                           |
| <b>All-cause mortality</b>                                                             |                                       |                  |                  |                  |                  |                           |
| Excluding subjects with extreme values of energy intake <sup>b</sup>                   | 1.00 (reference)                      | 0.88 (0.83–0.93) | 0.83 (0.78–0.89) | 0.86 (0.80–0.92) | 0.87 (0.81–0.92) | <b>0.011</b>              |
| Excluding deaths observed within the first five years of follow-up                     | 1.00 (reference)                      | 0.88 (0.83–0.94) | 0.83 (0.78–0.90) | 0.86 (0.79–0.92) | 0.88 (0.82–0.94) | <b>0.039</b>              |
| Adjustment for propensity score on unadjusted model                                    | 1.00 (reference)                      | 0.75 (0.71–0.79) | 0.74 (0.70–0.79) | 0.72 (0.67–0.77) | 0.78 (0.73–0.82) | <b>0.005</b>              |
| Additional adjustment for Healthy Eating Index-2015 <sup>c</sup>                       | 1.00 (reference)                      | 0.89 (0.84–0.94) | 0.84 (0.79–0.90) | 0.86 (0.80–0.92) | 0.86 (0.81–0.91) | <b>&lt;0.001</b>          |
| Additional adjustment for sodium, added sugars, and saturated fatty acids <sup>d</sup> | 1.00 (reference)                      | 0.88 (0.83–0.93) | 0.83 (0.78–0.89) | 0.85 (0.79–0.91) | 0.84 (0.79–0.90) | <b>&lt;0.001</b>          |
| <b>Cardiovascular mortality</b>                                                        |                                       |                  |                  |                  |                  |                           |
| Excluding subjects with extreme values of energy intake <sup>b</sup>                   | 1.00 (reference)                      | 0.78 (0.70–0.86) | 0.75 (0.66–0.84) | 0.75 (0.66–0.86) | 0.78 (0.69–0.87) | <b>0.027</b>              |
| Excluding deaths observed within the first five years of follow-up                     | 1.00 (reference)                      | 0.82 (0.73–0.91) | 0.78 (0.69–0.89) | 0.78 (0.68–0.89) | 0.82 (0.72–0.93) | 0.099                     |
| Adjustment for propensity score on unadjusted model                                    | 1.00 (reference)                      | 0.63 (0.57–0.69) | 0.63 (0.56–0.70) | 0.58 (0.51–0.65) | 0.64 (0.57–0.71) | <b>&lt;0.001</b>          |
| Additional adjustment for Healthy Eating Index-2015 <sup>c</sup>                       | 1.00 (reference)                      | 0.80 (0.72–0.88) | 0.76 (0.68–0.86) | 0.76 (0.67–0.86) | 0.77 (0.69–0.86) | <b>0.003</b>              |
| Additional adjustment for sodium, added sugars, and saturated fatty acids <sup>d</sup> | 1.00 (reference)                      | 0.79 (0.71–0.87) | 0.76 (0.67–0.85) | 0.76 (0.67–0.86) | 0.76 (0.68–0.85) | <b>0.003</b>              |
| <b>Cancer mortality</b>                                                                |                                       |                  |                  |                  |                  |                           |
| Excluding subjects with extreme values of energy intake <sup>b</sup>                   | 1.00 (reference)                      | 0.95 (0.85–1.07) | 0.94 (0.84–1.07) | 0.98 (0.86–1.12) | 0.99 (0.87–1.12) | 0.470                     |
| Excluding deaths observed within the first five years of follow-up                     | 1.00 (reference)                      | 0.91 (0.81–1.03) | 0.90 (0.79–1.03) | 0.95 (0.83–1.10) | 0.96 (0.84–1.09) | 0.464                     |
| Adjustment for propensity score on unadjusted model                                    | 1.00 (reference)                      | 0.87 (0.78–0.97) | 0.91 (0.81–1.02) | 0.91 (0.81–1.03) | 0.95 (0.85–1.07) | 0.075                     |
| Additional adjustment for Healthy Eating Index-2015 <sup>c</sup>                       | 1.00 (reference)                      | 0.96 (0.86–1.07) | 0.95 (0.84–1.07) | 0.99 (0.87–1.12) | 0.98 (0.87–1.10) | 0.654                     |
| Additional adjustment for sodium, added sugars, and saturated fatty acids <sup>d</sup> | 1.00 (reference)                      | 0.95 (0.85–1.06) | 0.94 (0.83–1.06) | 0.98 (0.87–1.12) | 0.97 (0.86–1.09) | 0.701                     |

<sup>a</sup>Values are hazard ratios (95% confidence intervals). Hazard ratios were adjusted for the following variables unless otherwise specified: age (years), sex (male, female), ethnicity (non-Hispanic white, non-Hispanic black, Hispanic, others), educational level (college below, college graduate, postgraduate), marital status (married or living as married, widowed, divorced, separated, never married), study center (10 categories), history of hypertension (yes, no), history of diabetes (yes, no), aspirin use (yes, no), hormone use status (current, former, never) for women, smoking status (current, former, never), alcohol consumption (g/day), body mass index (kg/m<sup>2</sup>), physical activity (min/week), energy intake from diet (kcal/day), and consumption of red meat (g/day), processed meat (g/day), fruit (g/day), vegetable (g/day), whole grain (servings/day), dairy (cups/day), coffee (g/day), and tea (g/day). For all-cause and cancer mortality, the model was further adjusted for family history of cancer (yes, no).

<sup>b</sup>Extreme values of energy intake are defined as <800 or >4000 kcal/d for men and <500 or >3500 kcal/d for women.

<sup>c</sup>This covariate was treated as the continuous variable in multivariable Cox regression.

<sup>d</sup>These covariates were treated as the continuous variable in multivariable Cox regression.

**Supplementary Table 2. Comparison of sociodemographic characteristics and medical histories between included and excluded populations\*.**

| Characteristics                      | Included population | Excluded population | Standardized difference |
|--------------------------------------|---------------------|---------------------|-------------------------|
| Number of participants               | 91891               | 62996               |                         |
| Age (years)                          | 65.3 ± 5.7          | 65.1 ± 5.8          | 0.033                   |
| Male                                 | 42543 (46.3)        | 29612 (47.0)        | 0.014                   |
| Ethnic group                         |                     |                     |                         |
| Non-Hispanic white                   | 83548 (90.9)        | 56513 (89.7)        |                         |
| Non-Hispanic black                   | 2981 (3.2)          | 2120 (3.4)          | 0.063                   |
| Hispanic                             | 1360 (1.5)          | 1458 (2.3)          |                         |
| Others †                             | 4002 (4.4)          | 2905 (4.6)          |                         |
| Body mass index (kg/m <sup>2</sup> ) | 27.2 ± 4.8          | 27.5 ± 5.1          | 0.070                   |
| Educational level                    |                     |                     |                         |
| College below                        | 58056 (63.3)        | 38934 (67.3)        |                         |
| College graduate                     | 16299 (17.8)        | 9043 (15.6)         | 0.084                   |
| Postgraduate                         | 17355 (18.9)        | 9872 (17.1)         |                         |
| Smoking status                       |                     |                     |                         |
| Current                              | 8473 (9.2)          | 5435 (9.4)          |                         |
| Past                                 | 38347 (41.7)        | 24407 (42.0)        | 0.009                   |
| Never                                | 45051 (49.0)        | 28223 (48.6)        |                         |
| History of diabetes                  | 5258 (5.8)          | 3865 (6.7)          | 0.039                   |
| History of hypertension              | 27745 (30.4)        | 17297 (30.0)        | 0.008                   |
| Family history of cancer             | 51525 (56.2)        | 31795 (55.0)        | 0.025                   |

\*Values are mean ± standard deviation or counts (percentage) as indicated.

†“Others” refers to Asian, Pacific Islander, or American Indian.

**Supplementary Table 3. Distribution of variables with missing data before and after multiple imputation<sup>a</sup>.**

| Variable                                  | Before multiple imputation | After multiple imputation | Number (%) with missing data |
|-------------------------------------------|----------------------------|---------------------------|------------------------------|
| Body mass index (kg/m <sup>2</sup> )      | 27.1 ± 4.7                 | 27.1 ± 4.8                | 1211 (1.32)                  |
| Physical activity (min/week) <sup>b</sup> | 125.5 ± 122.5              | 122.6 ± 123.0             | 22617 (24.61)                |
| Marital status                            |                            |                           |                              |
| Married                                   | 54007 (79.6)               | 71933 (78.3)              | 171 (0.19)                   |
| Widowed                                   | 5066 (7.5)                 | 7405 (8.1)                |                              |
| Divorced                                  | 6202 (9.1)                 | 8915 (9.7)                |                              |
| Separated                                 | 471 (0.7)                  | 698 (0.8)                 |                              |
| Never married                             | 2077 (3.1)                 | 2940 (3.2)                |                              |
| History of diabetes                       |                            |                           |                              |
| Yes                                       | 3317 (4.9)                 | 5286 (5.8)                | 524 (0.57)                   |
| No                                        | 64506 (95.1)               | 86605 (94.2)              |                              |
| History of hypertension                   |                            |                           |                              |
| Yes                                       | 19701 (29.0)               | 27915 (30.4)              | 508 (0.55)                   |

|                   |              |               |            |
|-------------------|--------------|---------------|------------|
| No                | 48122 (71.0) | 63976 (69.6)  |            |
| Educational level |              |               |            |
| College below     | 41640 (61.4) | 58165 (63.3)  | 181 (0.20) |
| College graduate  | 12547 (18.5) | 16332 (17.8)  |            |
| Postgraduate      | 13636 (20.1) | 17394 (18.9)  |            |
| Smoking status    |              |               |            |
| Current           | 5513 (8.1)   | 8478 (9.2%)   | 20 (0.02)  |
| Former            | 28376 (41.8) | 38353 (41.7%) |            |
| Never             | 33934 (50.0) | 45060 (49.0%) |            |

---

<sup>a</sup>Values are mean (standard deviation) or counts (percentage) as indicated.

<sup>b</sup>Total time of moderate to vigorous activity per week.
